# Supplementary material for: Genome and transcriptome sequencing characterises the gene space of Macadamia integrifolia (Proteaceae)
Source: PubMed Central journal article supplement (PMC5114810; doi:10.1186/s12864-016-3272-3), 2016-11-17

PLANT-PATHOGEN INTERACTION

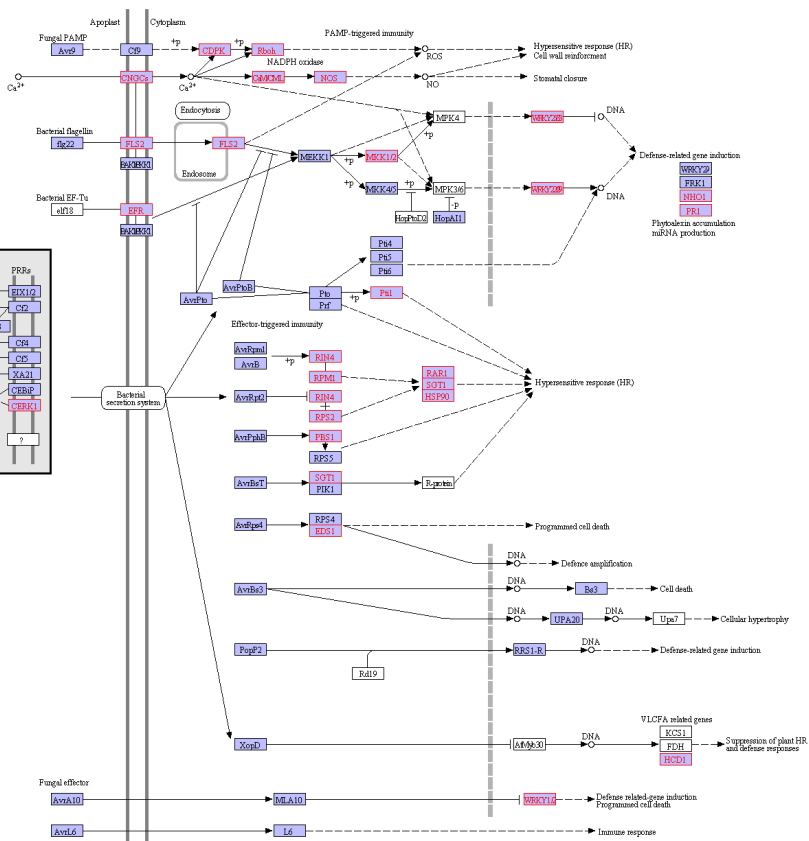

Supplement: 12864_2016_3272_MOESM2_ESM.pdf [file 12864_2016_3272_MOESM2_ESM.pdf]
