# Supplementary material for: Genome and transcriptome sequencing characterises the gene space of Macadamia integrifolia (Proteaceae)
Source: PubMed Central journal article supplement (PMC5114810; doi:10.1186/s12864-016-3272-3), 2016-11-17
Supplement: 12864_2016_3272_MOESM3_ESM.pdf [file 12864_2016_3272_MOESM3_ESM.pdf]

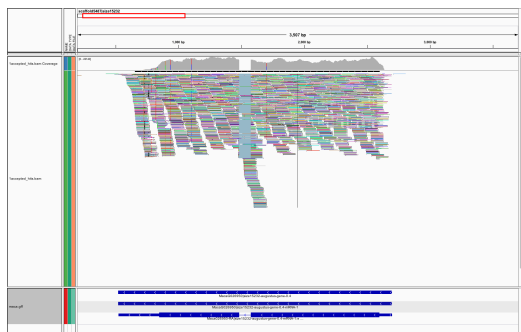

**CYP79** Maca026950-RA

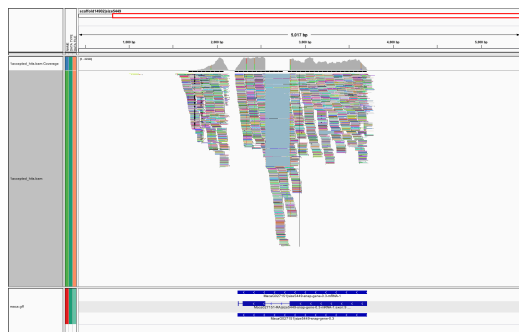

**CYP79** Maca027151-RA

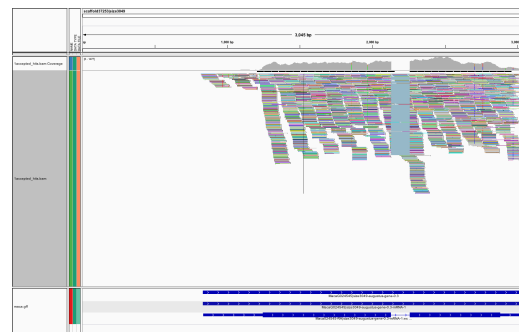

**CYP71** Maca024545-RA

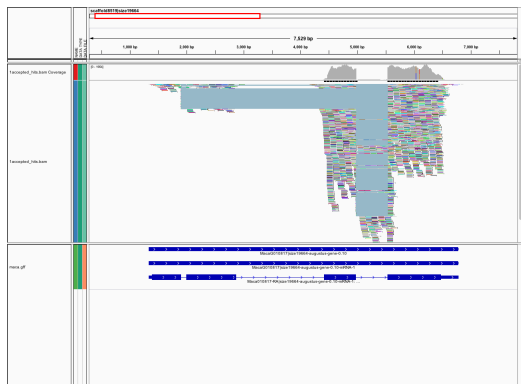

**UGT85** Maca010817-RA

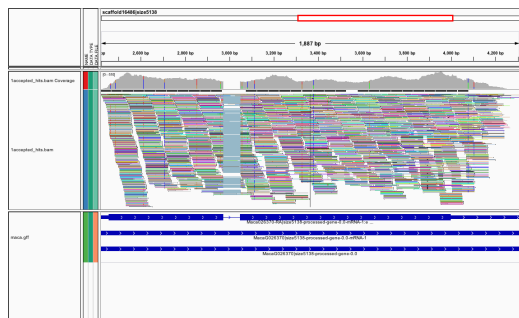

**UGT85** Maca026370-RA

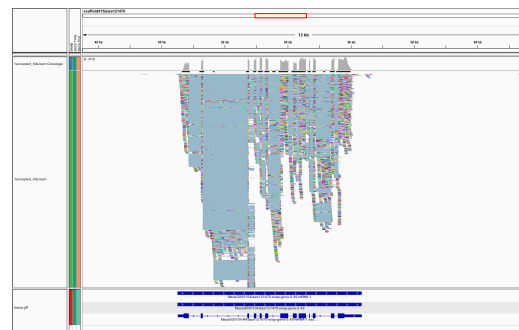

**$\beta$ -glucosidase** Maca000104-RA
